# Supplementary material
Source: PubMed Central journal article supplement (PMC3080449)
Supplement: NIHMS278582-supplement-1.pdf [file NIHMS278582-supplement-1.pdf]

## SUPPLEMENTAL MATERIALS

**Supplemental Table S1.** Absolute and Excess Mortality Rates per 100,000 per year following acute events in AIS, ICH and MI survivors

| Age Category | All cause-mortality in the general population |         | All cause excess mortality in AIS / ICH survivors |         | All cause absolute mortality in AIS / ICH Survivors |         |
|--------------|-----------------------------------------------|---------|---------------------------------------------------|---------|-----------------------------------------------------|---------|
|              | Males                                         | Females | Males                                             | Females | Males                                               | Females |
| 45 to 54     | 547.8                                         | 319.9   | +21                                               | +16     | 568.8                                               | 335.9   |
| 55 to 64     | 1131.0                                        | 698.5   | +35                                               | +28     | 1166.0                                              | 726.5   |
| 65 to 74     | 2612.2                                        | 1736.3  | +55                                               | +53     | 2677.2                                              | 1789.3  |
| over 75      | 8339.5                                        | 7240.6  | +85                                               | +89     | 8424.5                                              | 7329.6  |

**Supplemental Table S1 Legend.** AIS = acute ischemic stroke. ICH = intracerebral hemorrhage. MI = myocardial infarction. All cause mortality reflects non-AIS and non-ICH total mortality in AIS and ICH survivors.

**Supplemental Table S2.** Absolute and Excess Mortality Rates per 100,000 per year following acute events in MI survivors

| Age Category | All cause-mortality in the general population |         | All cause excess mortality in MI survivors |         | All cause absolute mortality in MI survivors |         |
|--------------|-----------------------------------------------|---------|--------------------------------------------|---------|----------------------------------------------|---------|
|              | Males                                         | Females | Males                                      | Females | Males                                        | Females |
| 45 to 54     | 547.8                                         | 319.9   | +17                                        | +15     | 564.8                                        | 334.9   |
| 55 to 64     | 1131.0                                        | 698.5   | +31                                        | +26     | 1157.0                                       | 724.5   |
| 65 to 74     | 2612.2                                        | 1736.3  | +48                                        | +44     | 2660.2                                       | 1780.3  |
| over 75      | 8339.5                                        | 7240.6  | +78                                        | +74     | 8417.5                                       | 7314.6  |

**Supplemental Table S2 Legend.** AIS = acute ischemic stroke. ICH = intracerebral hemorrhage. MI = myocardial infarction. All cause mortality reflects non-MI total mortality in MI survivors.

**Supplemental Figure S1.** Disease simulation results: cumulative-incidence and disease-free survival

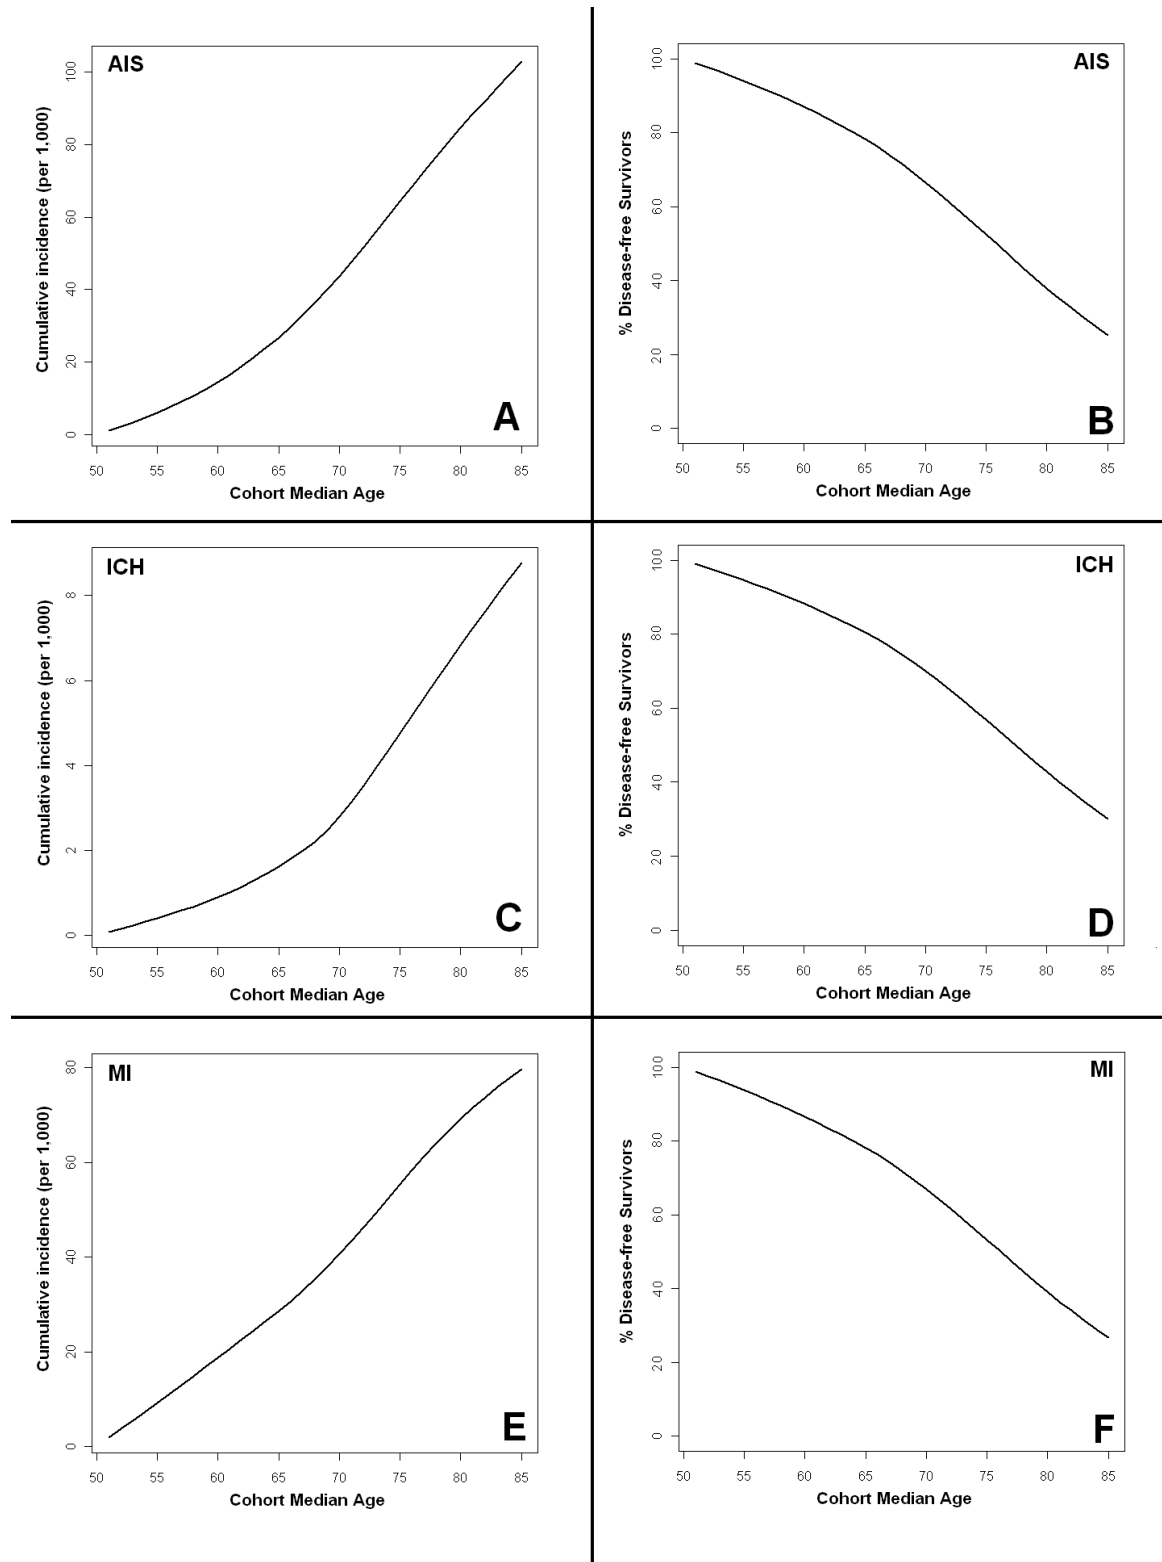

**Supplemental Figure S2.** Observed depletion in minor allele frequency with increasing age and relative risk of lethality in case-control simulation of acute ischemic stroke

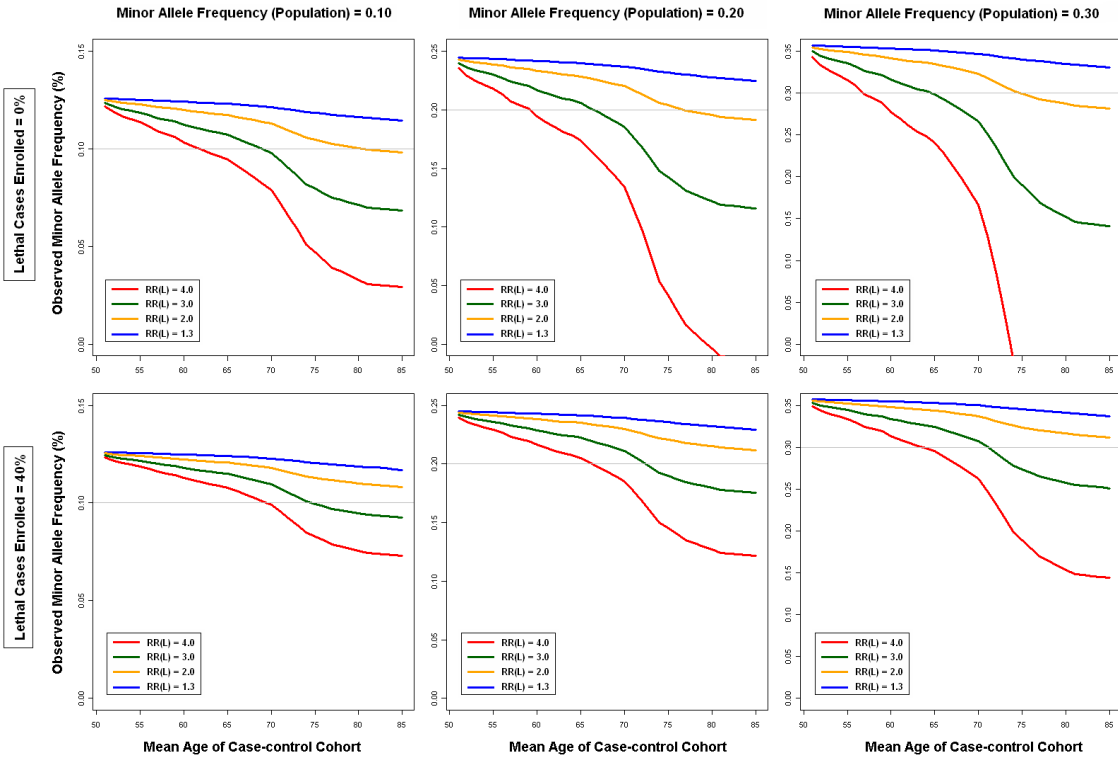

**Supplemental Figure S3.** Observed depletion in minor allele frequency with increasing age and relative risk of lethality in case-control simulation of intracerebral hemorrhage

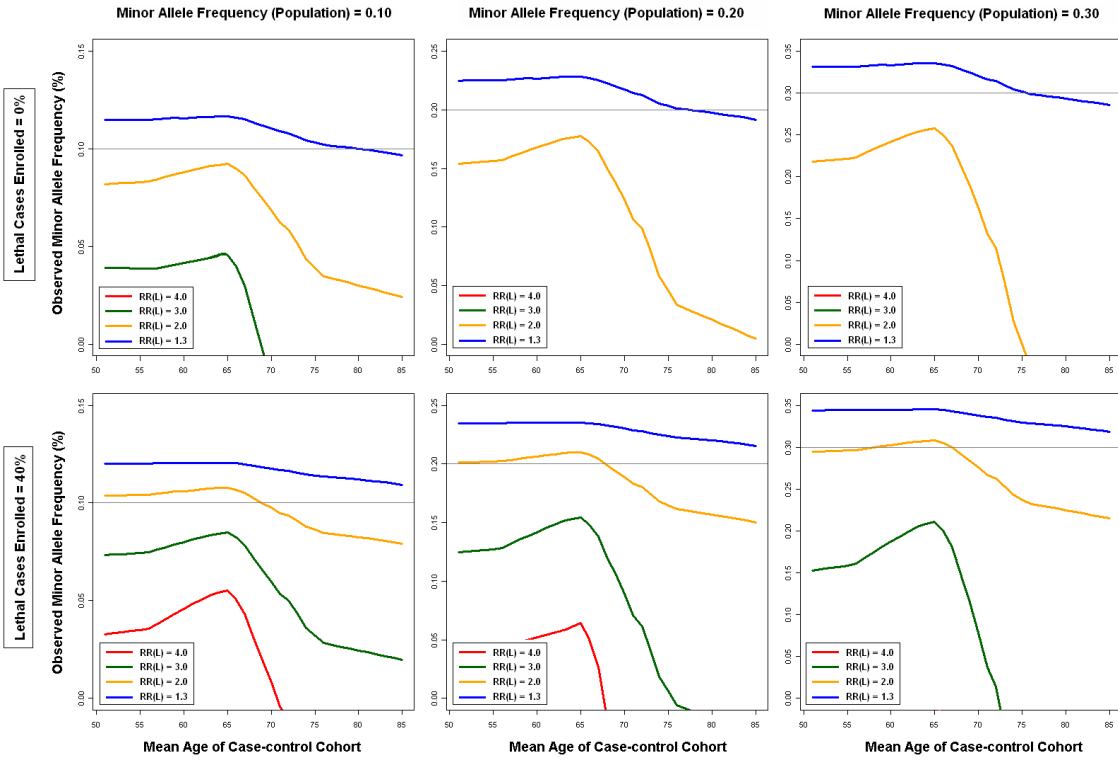

**Supplemental Figure S4.** Observed depletion in minor allele frequency with increasing age and relative risk of lethality in case-control simulation of myocardial infarction

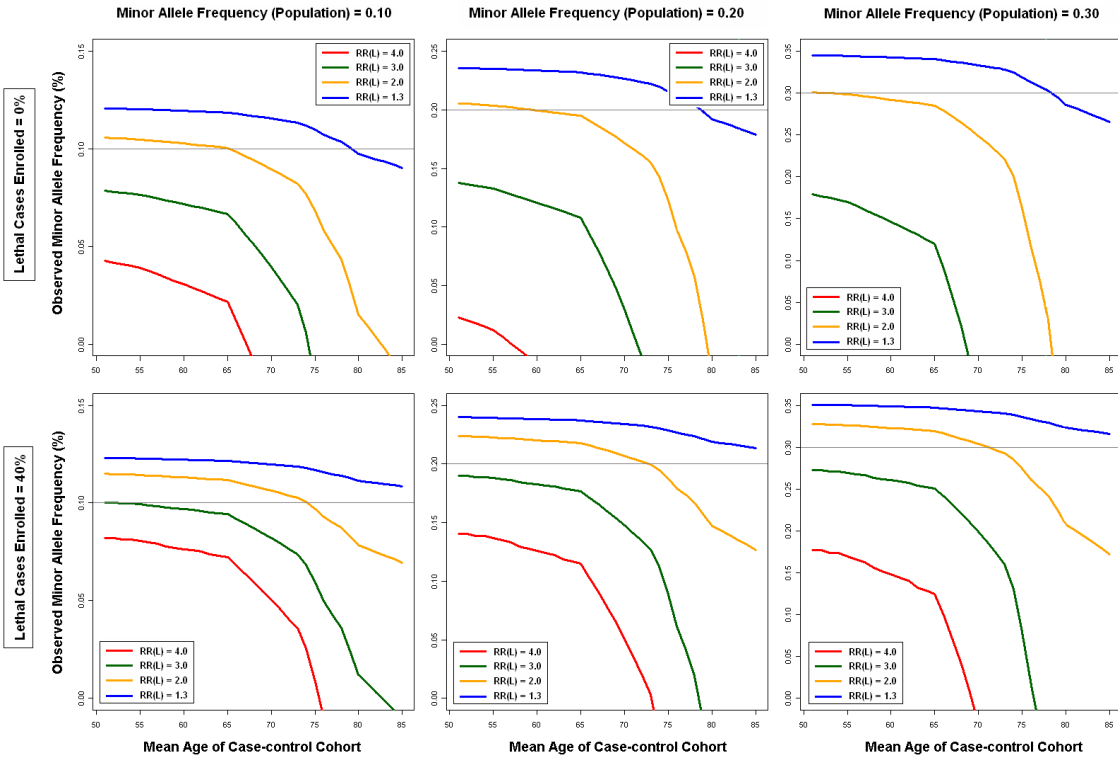

**Supplemental Figure S1 Legend.** Cumulative-incidence per 100,000 individuals (panels A,C,E) and percent of individuals enrolled at baseline surviving free of disease (panels B,D,F) under the simulation model presented in the Methods for acute ischemic stroke (panels A,B), intracerebral hemorrhage (panels C,D), and myocardial infarction (panels E,F). Estimates are calculated from the cohort after a simulated 35 year period from inception.

**Supplemental Figure S2 Legend.**  $RR(L)$  = genetic relative risk of lethality for the assumed genetic variant. Observed case minor allele frequencies (MAF) in a case-control framework are plotted for varying mean cohort ages and genetic relative risk of lethality. Separate simulations are shown for starting population MAF of 0.10, 0.20, and 0.30, as represented by the thin grey horizontal line on each plot. The top 3 graphs assume a 0% ascertainment of lethal cases, while the bottom 3 graphs assume a 40% ascertainment of lethal cases. Apparent reversal of effect is seen when the observed case MAF is below the population MAF (grey line).

**Supplemental Figure S3 Legend.**  $RR(L)$  = genetic relative risk of lethality for the assumed genetic variant. Observed case minor allele frequencies (MAF) in a case-control framework are plotted for varying mean cohort ages and genetic relative risk of lethality. Separate simulations are shown for starting population MAF of 0.10, 0.20, and 0.30, as represented by the thin grey horizontal line on each plot. The top 3 graphs assume a 0% ascertainment of lethal cases, while the bottom 3 graphs assume a 40% ascertainment of lethal cases. For graphs in which high  $RR(L)$  curves are absent, the genetic variant's MAF rapidly has rapidly decreased to zero, resulting in a monomorphic variant. Apparent reversal of effect is seen when the observed case MAF is below the population MAF (grey line).

**Supplemental Figure S4 Legend.**  $RR(L)$  = genetic relative risk of lethality for the assumed genetic variant. Observed case minor allele frequencies (MAF) in case-control are plotted for varying mean



cohort ages and genetic relative risk of lethality. Separate simulations are shown for starting population MAF of 0.10, 0.20, and 0.30, as represented by the thin grey horizontal line on each plot. The top 3 graphs assume a 0% ascertainment of lethal cases, while the bottom 3 graphs assume a 40% ascertainment of lethal cases. For graphs in which high RR(L) curves are absent, the genetic variant's MAF rapidly has rapidly decreased to zero, resulting in a monomorphic variant. Apparent reversal of effect is seen when the observed case MAF falls below the population MAF (grey line).

PubMed (<http://www.pubmed.org>) search terms for population-based incidence and mortality:

Acute Ischemic Stroke  
Stroke  
Ischemic Stroke  
Acute Ischemic Stroke  
Cerebral Infarction  
Cerebrovascular  
Incidence  
Prevalence  
Mortality  
Lethality  
Epidemiology  
Population  
Longitudinal  
Registry

Intracerebral Hemorrhage  
ICH  
Hemorrhage  
Hemorrhagic  
Stroke  
Intracerebral Hemorrhage  
Cerebrovascular  
Incidence  
Prevalence  
Mortality  
Lethality  
Epidemiology  
Population  
Longitudinal  
Registry

Myocardial Infarction  
Myocardial Infarction  
Acute Myocardial Infarction  
MI  
Cardiovascular  
Incidence  
Prevalence  
Mortality  
Lethality  
Epidemiology  
Population  
Longitudinal  
Registry
